# Supplementary material
Source: publisher figshare collection journal article supplement (https://rs.figshare.com/ndownloader/files/24383890)
Supplement: Supplementary file 1 [file 24383890]

## Sheet: Sheet1
Dataset S1. Characters used in this study with character state definitions. See also provided matrix file in Dataset S2.
#	CHARACTER	CHARACTER STATES									Source	Character Type
		0	1	2	3	4	4	6	7	8
Mandible
1	Inferior transverse torus	Present	Polymorphic	Absent							RM73	O, QL
2	Mandibular condyle height	Lower than coronoid	Equal or higher								RM74	O, QL
3	Superior transverse torus position	At 1/3 the height of symphysis	Mid-symphysis height								RM75	O, QL
4	Mandibular corpus shape	Deepens anteriorly	Polymorphic 0/2	Even	Polymorphic 2/4	Deepens posteriorly					General	O, QL
Palate
5	Dental arcade shape	Narrow anteriorly	Parallel tooth rows	Bowed laterally							AEA91	U, QL
6	Palatine process	Thin	Thick								BWR138	O, QL
7	Alveolar premaxilla*	Flat	Biconvex								BWR139	O, QL
8	Greater palatine foramen	Round	More elongated								BWR200	O, QL
9	Greater palatine foramena	Anterior	Posterior								BWR201	O, QL
10	Lesser palatine foramena	None	Small	Large							BWR202	O, QL
11	Horizontal palatine process	Broad	Narrow								BWR203/ RM87	O, QL
12	Palatine crest	Strong	Weak								BWR204	O, QL
13	Pyramidal process position	Superior	Inferior								BWR206	O, QL
14	Pterygoid process	Robust	Compressed								BWR207	O, QL
15	Incisive fossa position	Opposite canine	Distal to canine	Distal to P3							BWR140	O, QL
16	Incisive fossa	Absent	shallow	deep							BWR211	O, QL
17	Incisive canal caliber	Absent	Large	Small							BWR216	U, QL
18	Number of incisive foramina	Double	Single								AEA86	O, QL
19	Posterior palate depth	Shallow	Deep								BWR205	O, QL
20	Maxillary alveolar process	Collapsed	Solid	Inflated							BWR198	O, QL
21	Alveolar process depth	Shallow	Deep								BWR208	O, QL
Face
22	Maxillary sinus presence	Present	Absent								RAE8	O, QL
23	Maxillary sinus position	At the level of C1	Polymorphic 0/2	At the level of P3–P4	Polymorphic 2/4	Behind the premolars					BWR176	O, QL
24	Maxillary depth	Shallow	Deep								BWR144	O, QL
25	Lateral malar surface	Curved	Flat								BWR145	O, QL
26	Frontozygomatic breadth	Narrow	Thicker								BWR146	O, QL
27	Orbital breadth/ shape	Elongated	Circular	Broad ML							AEA56	O, QL
28	Nasal shape	Narrow superiorly	Broad superiorly								RM81	O, QL
29	Glabella	Indistinct	Inflated								BWR149	O, QL
30	Supraorbital region	Costae	Tori or arches	Strong inflated tori							RM95	O, QL
31	Supratoral sulcus	Absent/ shallow	Broad								BWR152	O, QL
32	Frontal sinuses	Present	Absent								RM91	O, QL
33	facial profile	Prosthion, rhinion, glabella in line	Stepped								RM89	O, QL
34	Zygomatic root pneumatization	Solid	Hollow								BWR172	O, QL
35	Inferior orbital foramen/nasal aperture	Near apex	Below apex								BWR173	O, QL
36	Zygomatic depth*	Shallow	Deep								BWR174	O, QL
37	Zygomatic orientation	Lateral (at an angle to plane of face)	Anterior (on the facial plane)								MK10	O, QL
38	Infraorbital surface of maxilla	Slopes posteroinferiorly	Sloped anteroinferiorly								RM94	O, QL
39	Maxillary nasal process*	Robust	Hollow								BWR177	O, QL
40	Orbital/nasal distance	Small	Large	Huge							BWR178	O, QL
41	Orbital/nasal surface	Concave	Flat								BWR179	O, QL
42	Interorbital distance	Very broad	Broad	Narrow							BWR180	O, QL
43	Inferior orbital border	Crested	Rounded								BWR181	O, QL
44	Zygomatic arch/orbit	Same level	Below								BWR182	O, QL
45	Zygomatic temporal process	Shallow	Deep								BWR183	O, QL
46	Zygomatic arch angle	Vertical	Inclined	Horizontal							BWR184	O, QL
47	Nasal aperture breadth	Narrow	Broad								BWR185	O, QL
48	Nasal aperture edges	Vertical	Inclined	Horizontal							BWR188	O, QL
49	Lacrimal fossa visible	Not visible	Visible								BWR189	O, QL
50	Nasal bone length	Short	Long	Very long							BWR190	O, QL
51	Nasal aperture/malar surface	Anterior	Intermediate	Flat							BWR191	O, QL
52	Rostrum length	Long rostrum (distance from orbitale to the anterior-most point of maxilla equals ~C1–M1 length)	Short rostrum (distance from orbitale to the anterior-most point of maxilla equals ~P3–C1 length)								AEA45	O, QL
53	Nasal apex/M2	Above or anterior	Posterior								BWR193	O, QL
54	Nasoalveolar clivus length	Short	Intermediate	Long							BWR214	O, QL
55	Maxillary surface	Lateral	Anterior								BWR194	O, QL
56	Canine fossa	Shallow	Deeper								BWR195	O, QL
57	Zygomatico-alveolar crest	Compressed	Broad								BWR209	O, QL
58	Zygomatic root height	Low	Higher								BWR210	O, QL
59	Zygomatic root position relative to M1	Anterior	Posterior/ above								RAE9	O, QL
60	Subnasal floor	Fenestrated	Stepped	Smooth							BWR212	U. QL
61	Nasoalveolar clivus orientation	Protruding	More vertical								RM77	O, QL
62	Premaxilla ascending wing	Broad	Narrow								RM76	O, QL
63	Orbit inferior margin	Flush with cheek	Sharp, protruding	Bar-like, protruding							RM78	O, QL
64	Orbit posiiton	High	Low								RM79	O, QL
65	Pyriform inferior border	Narrow, V-shaped	Wider and more rounded	Flat, horizontal							RM80	U. QL
66	Nasal bridge	Flat	Rounded horizontally								RM83	O, QL
67	Pre-maxilla nasal contact	Excluded or minimal	Mid-nasal	Extensive							RM84	O, QL
68	Atrioturbinal ridge	Present	Absent								RM85	O, QL
69	Infraorbital foramen present	Low	Very near orbital rim								RM92	O, QL
70	Position of the frontozygomatic suture	High frontozygomatic suture	Low frontozygomatic suture								MK6	O, QL
71	Orbital convergence (relative to the sagittal plane)	Slightly laterally-directed orbits	Frontalized orbits								AEA57	O, QL
72	Orbital frontation (relative to the Frankfurt plane)	Posteriorly inclined	Close to vertical								AEA58	O, QL
Neurocranium
73	Vertically oreinted frontal trigon	Present	Absent								RM96	O, QL
74	Length of the frontal in temporal fossa	Short frontal	Long frontal								MK7	O, QL
75	Temporal fossa	Narrow	Broader								BWR157	O, QL
76	Inion position relative to glabella in Frankfurt Horizontal	Above/ same plane	Lower	Very low							BWR158	O, QL
77	External occipital protuberance	Strong	Reduced								BWR159	O, QL
78	Nuchal plane orientation*	Superior	Posterior	Inferior							BWR160	U. QL
79	Neurocranial length	Short	Elongated								BWR162	O, QL
80	Temporal line	Runs parallel with the lateral aspects of the supraorbital for a short distance	Bends posteriorly away from the lateral aspects of the supraorbital								DC2	O, QL
81	Frontal squama	Vertical	Intermediate	More horizontal							BWR155	O, QL
82	Coronoal suture orientation/position of bregma	Coronal/anterior	V-shaped/posterior								NEA82	O, QL
Basicranium
83	Glenoid fossa	Shallow	Deep								BWR163	O, QL
84	Articular tubercle	Large	Small								BWR164	O, QL
85	Articular portion (postglenoid process) and tympanic portion of temporal bone	Unfused	Fused								BWR167	O, QL
86	Postglenoid foramen	Large	Reduced	Absent							RM97	O, QL
87	Ectotympanic	Annular	Semi-tubular	Tubular							RM98	O, QL
88	Orientation of the ectoympanic tube	Straight, posteriorly directed	Curves anteriorly (laterally or anteriorly directed)								NEA88	O, QL
Dentition
89	I1 size (I1 MD/M1 BL)	Small	Intermediate-small	Intermediate-large	Large						NEA89	O, QN
90	I1 shape	Labiolingually thin	Labiolingually thick								RM1	O, QL
91	I2 size	Much smaller than I1	Slightly smaller than I1								RM2	O, QL
92	I2 cingulum	Present	Absent								RM3	O, QL
93	Incisor crown waisting	Absent	Present								RM4	O, QL
94	Upper canine bilateral compression	Very compressed	Compressed	Less compressed							RM5	O, QL
95	P2	Present	Absent								RM6	O, QL
96	Upper premolar cusp heteromorphy	Marked	Reduced	Subequal							RM7	O, QL
97	Upper premolar cusp volume	Buccolingually narrow	Inflated, not crowded	Inflated and crowded							RM8	U. QL
98	P3 crown shape	Triangular	Sub-ovoid	Very ovoid							RM9	O, QL
99	P3 distal margin	Convex	Angled	Straight							RM10	U. QL
100	P3 proporitions	Very broad	Broad	Narrow	Very narrow (mesiodistally expanded)						RM11	O, QL
101	P3 transverse crest	Links cusps	Cusps separated by groove								RM12	O, QL
102	P3 buccal cingulum	Absent	Present								RM13	O, QL
103	P3 protocone lingual face	Sloping	Vertical								RM14	O, QL
104	P3 buccal face	Triangular	Diamond-shaped	With mesiobuccal expansion on root	Triangular or with buccal exansion						RM15	U. QL
105	P3 lingual cingulum	Inflated	Present	Absent							RM16	O, QL
106	P4 proportions	Very broad	Broad	Narrow	Very narrow						RM17	O, QL
107	P4 crown shape	Triangular	Sub-ovoid	Ovoid							RM18	O, QL
108	P4 lingual cingulum	Inflated	Present	Polymorphic	Absent						RM19	O, QL
109	Molar cusp form	High and sharp	Low and rounded	High and inflated	High and very inflated						RM20	U. QL
110	M1 crown	Very broad	Broad	Narrow	Very narrow						RM21	O, QL
111	M1 outline shape	Narrow triangle	Rounded triangle	Square							This study	O, QL
112	M2 crown	Very broad	Broad	Narrow	Very narrow						RM22	O, QL
113	M1 metacone and hypocone size	Similar to mesial cusps	Smaller than mesial cusps								RM23	O, QL
114	M2 cusp at mesiolingual corner of crown	Absent	Present								RM24	O, QL
115	M1-M2 waisting	Absent	Present								RM25	O, QL
116	M1-M2 crown tapering	None	Distal tapering	Strong distal tapering							RM26	O, QL
117	M1-M3 lingual cingulum	Strong	Reduced	None							RM27	O, QL
118	M2-M3 buccal cingulum	Present	Absent								RM28	O, QL
119	M1-M2 mesial shelf	None	Narrow cingulum	Pronounced cingulum	Shelf						RM29	O, QL
120	M1-M3 bilophodonty	Absent	Incomplete bilophodonty	Bilophodont							General	O, QL
121	M3 distal moiety	Reduced	Unreduced								RM30	O, QL
122	Metacone size	<Protocone	>/Equal to protocone								RM31	O, QL
123	Protocone position	Aligned with paracone	Polymorphic	Distal to paracone and crown margin							RM32	O, QL
124	Crista obliqua	Present	Polymorphic	Absent							RM33	O, QL
125	Protoconule size	Large	Small	Absent							RM34	O, QL
126	Hypocone-metacone crista	Discontinuous	Polymorphic 0/2	Continuous							RM35	O, QL
127	Hypocone position	In line with metacone	Distal to metacone	Distobuccal	More lingual than protocone						RM36	U. QL
128	Prehypocrista position	Meets base of protocone	Meets crista obliqua								RM37	O, QL
129	Trigon size	Broad	Narrow	Very narrow and crescentric							RM38	O, QL
130	Talon size	Absent	Small	Large relative to trigon							RM39	O, QL
131	M1-M3 size sequence	M1 < M2 < M3	M1 < M3 < M2	M1~M3<M2	M3<M1<M2	M3<M2<M1					RM40	U. QL
132	i1 shape	Narrow and tall	Broad and shorter								RM41	O, QL
133	i2 shape	Narrow and tall	Broad and shorter								RM42	O, QL
134	i2 lingual cingulum	Absent	Present								RM43	O, QL
135	lower incisor lingual enamel	Present	Absent								RM44	O, QL
136	i2 distal margin	Angled	Straight								RM45	O, QL
137	p3 alignment	Oblique to tooth row	Nearly in line								RM46	O, QL
138	p3 sectorality	Non-sectorial	Poor	Moderate							RM47	O, QL
139	p3 mesiolingual beak	Absent	Present								RM48	O, QL
140	p3 metaconids	Present	Polymorphic	Absent							RM49	O, QL
141	p3 root fusion	2-3 Roots	Single-rooted								This study	O, QL
142	p4 length	Very narrow	Narrow	Broad	Very broad						RM50	O, QL
143	p4 buccal flare	Slight	Strong								RM51	O, QL
144	p4 mesial fovea height	Slightly above distal basin	Much higher than distal basin								RM52	O, QL
145	m1 crown shape	Very narrow	Long, narrow	Broad	Very broad						RM53	O, QL
146	m1 crown taperinig	Tapering anteriorly	No tapering								RM54	O, QL
147	m2 crown shape	Very narrow	Long, narrow	Broad	Very broad						RM56	O, QL
148	m2-m3 Pliopithecine trangle	None	Variable	Present							RM57	O, QL
149	Paracristid	Curved	Beak-like								RM58	O, QL
150	m1- m2 Protoconid-metaconid	Oblique	Transverse								RM59	O, QL
151	m1-m2 mesial lophid	Absent	Present								RM60	O, QL
152	m1-m2 paraconids	Present	Absent								RM61	O, QL
153	m1-m2 hypoconulid position	Appressed to entoconid	Median	Buccal	Twinned with hypoconid						RM62	U. QL
154	m1-m2 crown outline	Rectangular	Slightly ovoid	Ovoid							RM63	O, QL
155	m1-m2 hypoconulid	present	polymorphic	absent							RM64	O, QL
156	m1-m3 cristid obliqua	Oblique	Polymorphic 1	Slightly oblique	Polymorphic 2	Straight					Modified RM 55, 65	O, QL
157	m1-m3 buccal cingulum	well-developed	only in notches	none							RM66	O, QL
158	m1-m3 lingual notch depth	shallow	deep, opening into talonid								RM67	O, QL
159	m1-m3 mesial fovea	broad	narrow								RM68	O, QL
160	m1-m3 distal fovea	wide	narrow	narrow and distally projecting							RM69	U. QL
161	m3 shape	rel untapered	tapers distally	tapers strongly, entoconid indistinct							RM70	O, QL
162	m3 hypoconulid and entoconid linked by crest	yes	polymorphic	no							RM71	O, QL
163	m3 hypoconid and entoconid linked by crest	no	yes	true distal lophid							RM72	O, QL
164	m3 entoconid and hypoconulid area relative to remaining cusps	Unreduced	Moderately reduced	Very reduced							This study	O, QL
165	m3 mesial transverse crest	Oblique	Polymorphic	Transverse							HGT10	O, QL
166	m3 crown shape										This study	O, QN
167	m3 flare										This study	O, QN
168	m3/ m2 size										This study	O, QN
Postcranium
169	Lumbar centra	dorsoventrally compressed and small	expanded	very expanded							RM99	O, QL
170	Vertebral body keeling	present	absent								RM100	O, QL
171	Transverse processes	on body	base of pedicle	on pedicle							RM101	O, QL
172	Transverse process inclination	ventrally inclined	neutral	dorsally and caudally inclined							RM102	O, QL
173	Accessory processes	present	polymorphic	absent or reduced							RM103	O, QL
174	Spinous process inclination	cranially inclined	caudally inclined								RM104	O, QL
175	Lumbar centrum hollowing	present	absent or reduced								RM105	O, QL
176	Lumbar centrum spooling	present	absent or reduced								RM106	O, QL
177	Lumbar number	7	7 or 6	6	6 or 5	5	5 or 4	4	4 or 3	3	RM107; modified based on Williams & Russo, 2015	O, Categorical
178	Sacral number	3	3 or 4	4	4 or 5	5	5 or 6	6			RM107; modified based on Williams & Russo, 2015	O, Categorical
179	Ischial spine	distal to acetabulum	level with acetabulum								RM109	O, QL
180	Acetabulum	expanded with raised lip	cranially expanded lunate surface	symmetrical lunate surface							RM110	U. QL
181	Sacrum shape	broad	narrow								RM111	O, QL
182	Scapula shape	vertebral border < caudal	long vertebral border								RM112	O, QL
183	Scapular spine	oblique to axial border	low angle to axial border								RM113	O, QL
184	Glenoid curvature	more curved craniocaudally than dorsoventrally	uniformly and moderately curved								RM114	O, QL
185	Glenoid orientation	faces laterally	faces cranially								RM115	O, QL
186	Scapula position	lateral	dorsal on thorax								RM116	O, QL
187	Sternum	long, narrow	short, broad								RM117	O, QL
188	Humeral head orientation	<15 degrees	> 15 degrees								RM118	O, QL
189	Dorsal Epitrochlear fossa	present	absent								RM119	O, QL
190	Medial epicondyle orientation	very retroflexed	slightly retroflexed	medial							RM120	O, QL
191	Medial trochlear keel	anterior to epicondyle	projects distal to epicondyle								RM121	O, QL
192	Lateral trochlear keel	weak	moderate	strong							RM122	O, QL
193	Entepicondylar foramen	present	polymorphic	absent							RM123	O, QL
194	Olecranon fossa	shallow	deep, sharp laterally								RM124	O, QL
195	Olecranon fossa articular surface	no extension into fossa	extends into fossa laterally								RM125	O, QL
196	Trochelar breadth	< capitular	> capitular								RM126	O, QL
197	Distal humerus anteroposterior thickness	very thin	intermediate	deep							RM127	O, QL
198	Zona conoidea	shallow, broad	deep, narrow								RM128	O, QL
199	Trochlear proximal border	straight	V-shaped for coronoid beak								RM129	O, QL
200	Humeral shaft curvature	straight	retroflected	stongly retroflected							RM130	O, QL
201	Deltoid insertion	on proximal half of shaft	on distal half								RM131	O, QL
202	humeral head shape	oblong, extending between tuberosities	less oblong	spherical with tuberosities anterior							RM132	O, QL
203	Tuberosity sizes	lesser tuberosity <60% of greater tuberosity	60-80%								RM133	O, QL
204	Bicipital groove	broad	intermediate	narrow							RM134	O, QL
205	Humeral head height	lower than tuberosities	equal or slightly higher	much higher							RM135	O, QL
206	Humeral/ femoral head size	humeral head <femoral	humeral head > femoral								RM136	O, QL
207	Ulnar olecranon process size (% of sigmoid notch shape)	very short (<50)	short (51-80)	long (80-100)	very long (>100)						RM137	O, QL
208	Olecranon orientation	proximal	polymorphic	posterior							RM138	O, QL
209	Sigmoid notch shape	long, narrow	low, wide								RM139	O, QL
210	Sigmoid median keel	none	strong keel								RM140	O, QL
211	Ulnar shaft cross section	ML <66% of AP	>66% of AP								RM141	O, QL
212	Ulnar shaft bowing	convex dorsally	concave or straight dorsally								RM142	O, QL
213	Distal ulna shape	ML narrow	ML broad								RM143	O, QL
214	Styloid-triquetral articulation	large styloid and articular surface	small styloid and articular surface								RM144	O, QL
215	Distal radioulnar articulation	prximodistally narrow	proximodistally expanded								RM145	O, QL
216	Distal ulnar facet on radius	faces medially	faces proximomedially								RM146	O, QL
217	Radial notch position	anterior to lateral third of shaft	anterior to middle of shaft								RM147	O, QL
218	Radial notch orientation	anterolateral	lateral								RM148	O, QL
219	Radial head outline	oval with flat posterolateral area	smaller flat area	round							RM149	O, QL
220	Radial head lateral lip	large	present	absent							RM150	O, QL
221	Radial notch shape	single oval facet	two faces at 90 degree angle	two separated facets							RM151	O, QL
222	Radial styloid process	prominent	reduced								RM152	O, QL
223	Radial lunate articular surface	AP narrow	ventrally expanded								RM153	O, QL
224	Dorsal ridge on radius	absent	present								RM154	O, QL
225	Distal metacarpal shape	widest palmerly	quadrilateral								RM155	O, QL
226	Tibial condylar facets	medial larger	symmetrical	lateral larger							RM156	O, QL
227	Distal fibula	robust, flares laterally	reduced, less lateral flare								RM157	O, QL
228	Femoral head shape	spherical and spearate from neck	blends with neck superoposteriorly								RM158	O, QL
229	Femoral head height	below trochanter	at or above trochanter								RM159	O, QL
230	Femoral neck tubercle	present	absent								RM160	O, QL
231	Gluteal tuberosity	absent	ridge-like	distinct							RM161	O, QL
232	Femoral condyles	nearly symmetrical	medial larger								RM162	O, QL
233	Patellar groove	narrow, deep	broad, shallow	wider than shaft							RM163	O, QL
234	Talar proximal tubercles	moderately developed	poorly developed								RM164	O, QL
235	Cotylar fossa	distinct cup	shallow								RM165	O, QL
236	Talar trochlear wedging	stong	weak								RM166	O, QL
237	Talar trochlear rim asymmetry	subequal height	lateral keel taller	polymorphic 1/3	much taller						RM167	O, QL
238	Talar head	width=height	width>height								RM168	O, QL
239	Fibular facte of talus	vertical	laterally projecting								RM169	O, QL
240	Curve of medial trochlear margin (talus)	gently curved	strongly curved								RM170	O, QL
241	Curve of talar body	tight curve	higher radius of curvature								RM171	O, QL
242	Ectal facet curve	gently concave	sharply concave								RM172	O, QL
243	Ectal facet shape	broadest anterolaterally	broadest proximomedially								RM173	O, QL
244	Anterior calcaneal length	> 1/3 total length	1/3	< 1/3							RM174	O, QL
245	Posterior calcaneoastragular joint	faces medially	faces dorsally								RM175	O, QL
246	Sustentacular facet	undivided	divided								RM176	O, QL
247	Calcaneocuboid joint	round facet with deep pit	smaller pit								RM177	O, QL
248	Heel tubercle	present	absent								RM178	O, QL
249	Metatarsal II lateral facet	divided	single								RM179	O, QL
250	Entocuneiform-MT 1 facet	convex with medial extensions	less convex with slight extension								RM180	O, QL
251	Metacarpal II medial facet	undivided	divided by ligament pit								RM181	O, QL
252	MCI proximal articulation	no lateral extension	lateral extension								RM182	O, QL
253	Metacarpal dorsal ridges	absent	present								RM183	O, QL
254	Trapezium-MCI joint	sellar	modified hinge	non-sellar							RM184	U, QL
255	Os centrale	free	fused								RM185	O, QL
256	Capitulum	no distal expansion of surface	distal expansion of articular surface								RM186	O, QL
257	Hamate distolateral edge	uninterrupted	interrupted by ligament pit								RM187	O, QL
258	Scahpoid beak	absent	present								RM188	O, QL
259	Capitate distal surface	concave	biconcave								RM189	O, QL
260	Capitate and hamate surface	long, narrow	proximodistally short								RM190	O, QL
261	Hamate hamulus	not projecting	distally projecting								RM191	O, QL
262	Tail	present	absent								General	O, QL
263	Body size (based on lower molar size)	Unreduced	Polymorphic	Reduced							General	O, QL
Endocranium
264	Arc height of the anterior semicircular canal relative to its arc width	71-80%	81-90%	91-100%							NEA257	O, QL
265	Arc height of the lateral semicircular canal relative to its arc width	76-80%	81-90%,	91-101%							NEA258	O, QL
266	Arc size of the lateral semicircular canal relative to the sum of all three canal arc sizes	28-29%	30-31%	32-34%							NEA259	O, QL
267	Arc size of semicircular canals relative to body mass	relatively small	relatively large								NEA260	O, QN
268	Olfactory bulb size and orientation	well-developed and rostrally projecting	small relative to cerebrum and not rostrally projecting								NEA261	O, QL
269	Endocranial volume relative to body mass	relatively small	intermediate	relatively large							NEA262	O, QN
Dental Development
270	Advanced I1 development	M1 devleops in advance; I1 develops with similar timing to rest of dentition	polymorphic 0/2	I1 and M1 develop with similar timing							NEA263	U. QL
271	M1/ M2 development	M2 initiate before/around half M1 development	polymorphic 0/2	M2 initiate around 2/3 M1 development	M2 initiate around end of M1 development	M2 initiate after M1 completion					NEA264	U. QL
272	M2/P4 development	P4 advanced compared to M2	P4 equivalent to M2	polymorphic 1/3	M2 advanced compared to P4						NEA265	U. QL
*Denotes BWR characters that were not scored for taxa not included in the original BWR matrix due to high interobservor error (i.e., in some cases, character and character state definitions in the given reference were unclear, making it impossible for us to confidently score additional taxa).
AEA= Alba et al., 2015; BWR= Begun et al., 1997; DC= Cameron, 1997; HGT10=Harrison & Gu, 1999 (Table 10); MK= Moyà-Solà & Köhler, 1995; NEA= Nengo et al., 2017 RAE= Rae, 1999; RM= Rossie & MacLatchy, 2006. Numbers following abbreviation in the Source column refer to the character number in the referenced study.
